# Supplementary material for: An effective and environment-friendly system for Cu NPs@RGO-catalyzed C–C homocoupling of aryl halides or arylboronic acids in ionic liquids under microwave irradiation
Source: Royal Society of Chemistry journal article supplement (doi:10.1039/c6ra04683e), 2016-01-01
Supplement: c6ra04683e1.pdf [file c6ra04683e1.pdf]

## Supporting Information

**An effective and environment-friendly system for Cu NPs@RGO-catalyzed C-C  
homocoupling of aryl halides or arylboronic acids in ionic liquids under microwave  
irradiation**

Hongyan Zhao<sup>a, b</sup>, Guijie Mao<sup>a</sup>, Huatao Han<sup>a, b</sup>, Jinyi Song<sup>a, b</sup>, Yang Liu<sup>a, b</sup>, Wenyi Chu\*<sup>a, b</sup>

and

Zhizhong Sun\*<sup>a, b</sup>

<sup>a</sup>School of Chemistry and Materials Science, Heilongjiang University, Harbin 150080, P. R. China

<sup>b</sup>Key Laboratory of Chemical Engineering Process and Technology for High-efficiency Conversion,

College of Heilongjiang Province, Harbin 150080, P. R. China

<sup>3</sup>Harbin Environmental Monitoring Central Station, Harbin 150076, P. R. China

(E-mail: wenyichu@hlju.edu.cn, sunzz@hlju.edu.cn)

### Table of content

|                                                                       |           |
|-----------------------------------------------------------------------|-----------|
| <b>EDXRF accurately measure the content of Cu .....</b>               | <b>S2</b> |
| <b>Nitrogen sorption isotherms of RGO and different catalyst.....</b> | <b>S2</b> |
| <b>HRTEM image.....</b>                                               | <b>S3</b> |
| <b>TEM images and particle size distribution.....</b>                 | <b>S4</b> |
| <b>TEM image of the catalyst after 5-round.....</b>                   | <b>S5</b> |

Table S1 EDXRF accurately measure the content of Cu

| Samples          | Intensity | Content (%) |
|------------------|-----------|-------------|
| 5wt% Cu NPs@RGO  | 0.07576   | 2856.7152   |
| 10wt% Cu NPs@RGO | 0.15872   | 6115.2753   |
| 15wt% Cu NPs@RGO | 0.25166   | 9765.3298   |

Table S2 BET surface area of parent RGO as well as different Cu loaded samples

| Samples                | $S_{\text{BET}}/\text{m}^2\text{g}^{-1}$ |
|------------------------|------------------------------------------|
| reduced graphene oxide | 233.4                                    |
| 5wt% Cu NPs@RGO        | 145.7                                    |
| 10wt% Cu NPs@RGO       | 128.1                                    |
| 15wt% Cu NPs@RGO       | 98.2                                     |

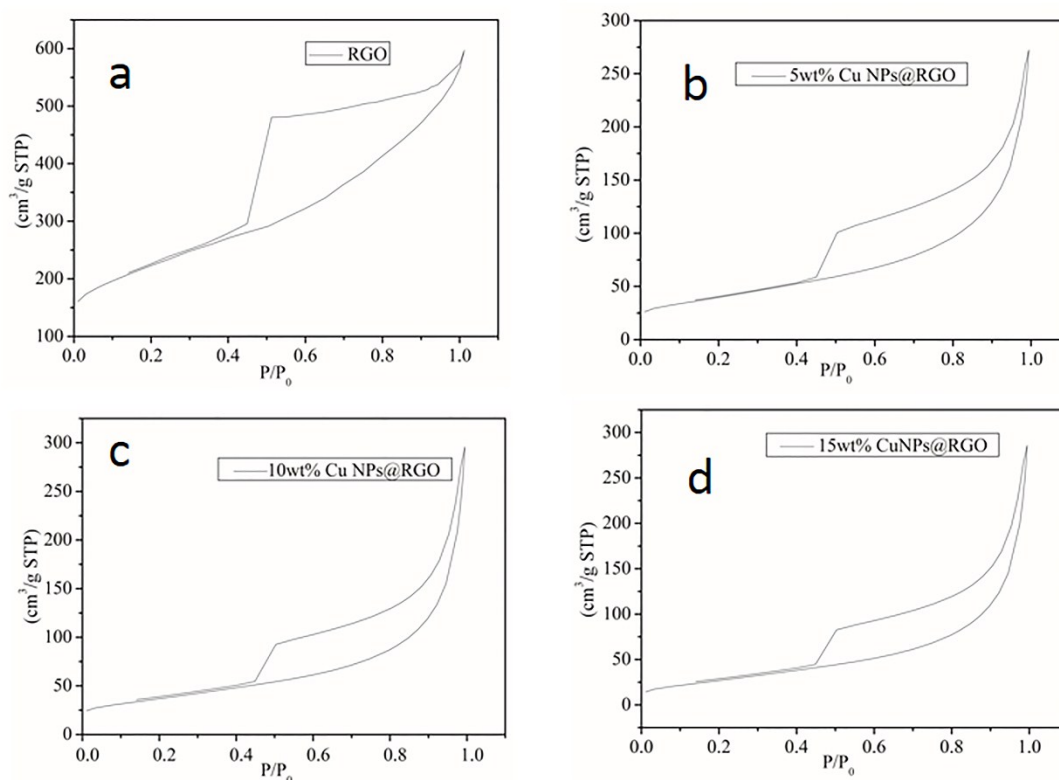

Figure S1 Nitrogen sorption isotherms of RGO and different catalyst

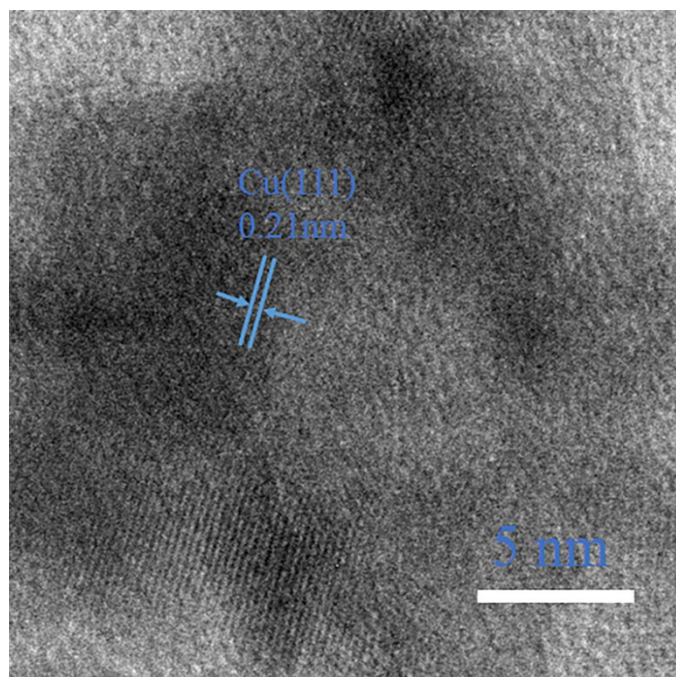

FigureS2 HRTEM image

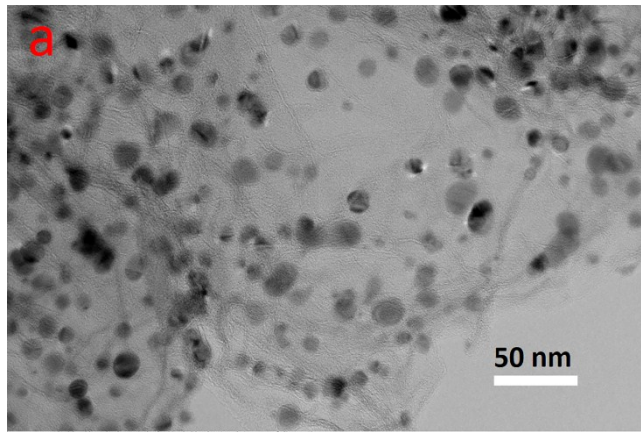

FigureS3 TEM images of the Cu nanoparticles on RGO nanosheets.

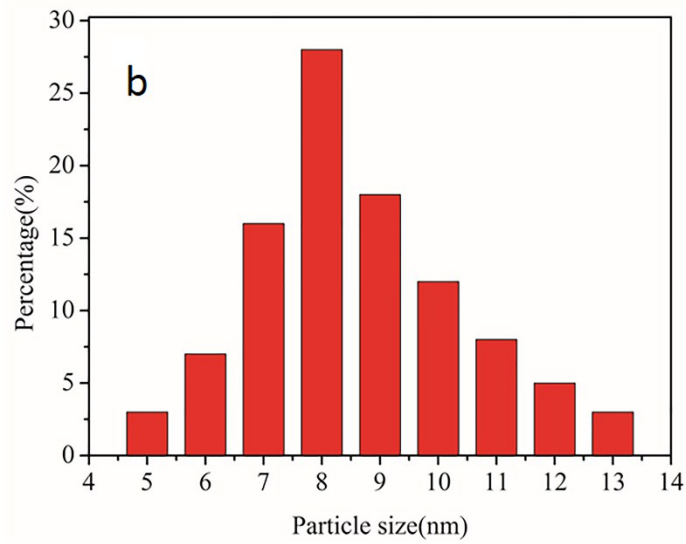

FigureS4 Particle size distribution of Cu NPs@RGO catalyst.

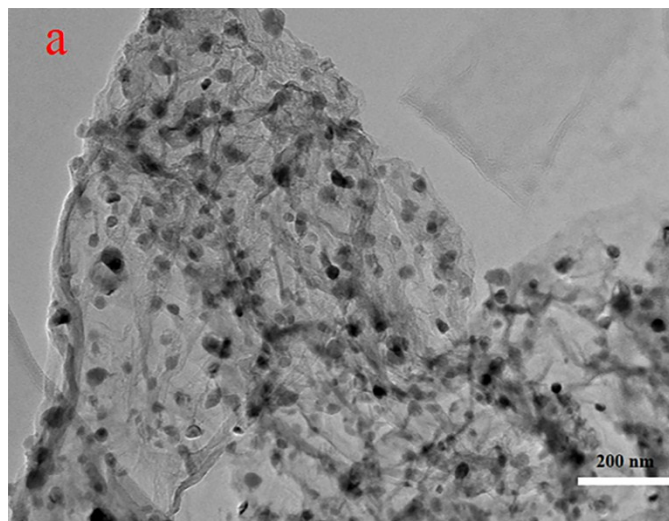

FigureS5 TEM image of the catalyst and the size distribution of nanoparticles after 5-round(a).

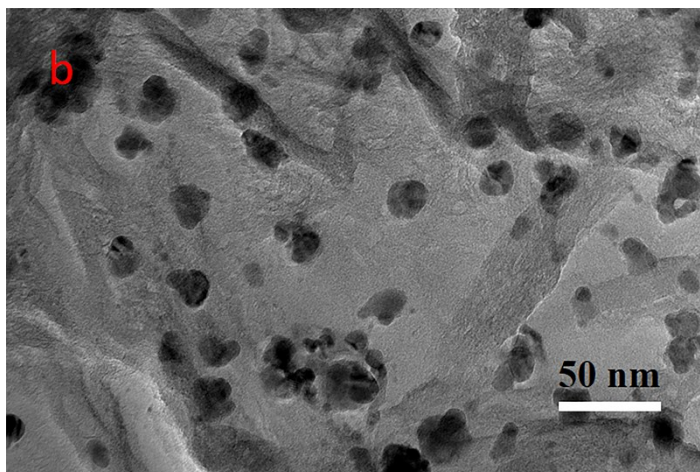

FigureS6 TEM image of the catalyst and the size distribution of nanoparticles after 5-round(b)
